# Supplementary material for: Transient optical absorption as a powerful tool for engineering of lead tungstate scintillators towards faster response
Source: Royal Society of Chemistry journal article supplement (doi:10.1039/d2tc01450e), 2022-01-01
Supplement: d2tc01450e1.pdf [file d2tc01450e1.pdf]

## Supplementary Information

### Transient optical absorption as a powerful tool for engineering of lead tungstate scintillators towards faster response

Gintautas Tamulaitis<sup>\*a</sup>, Saulius Nargelas<sup>a</sup>, Mikhail Korjik<sup>b</sup>, Vitaliy Mechinsky<sup>b</sup>, Yauheni Talochka<sup>a</sup>, Augustas Vaitkevičius<sup>a</sup> and Andrey Vasil'ev<sup>c</sup>

*a. Institute of Photonics and Nanotechnology, Vilnius University, Saulėtekio al. 3, LT-10257, Vilnius, Lithuania*

*b. Research Institute for Nuclear Problems, Bobruiskaya str. 11, Minsk, Belarus*

*c. Institute of Nuclear Physics of Moscow State University, Leninskie Gory, 1(2), Moscow, Russia*

\*corresponding author: [gintautas.tamulaitis@ff.vu.lt](mailto:gintautas.tamulaitis@ff.vu.lt)

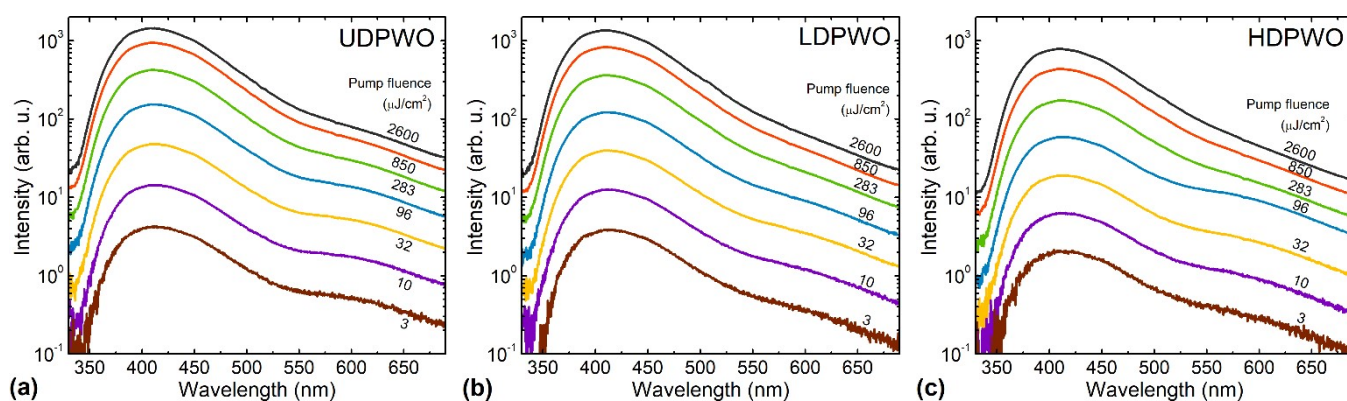

**Fig. S1** Room-temperature photoluminescence spectra at different excitation fluences (indicated) for samples UDPWO (a), LDPWO (b), and HDPWO (c).

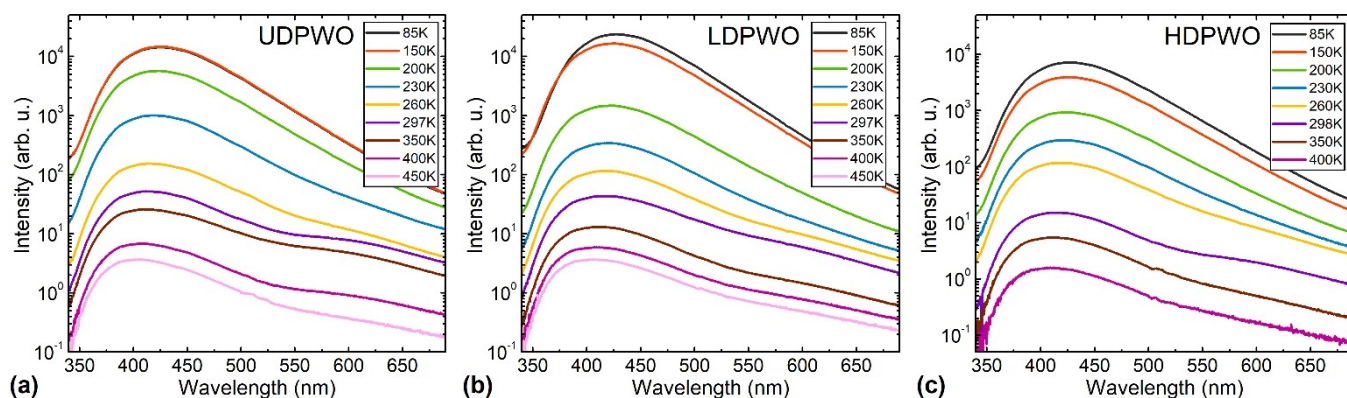

**Fig. S2** Photoluminescence spectra of samples UDPWO (a), LDPWO (b), and HDPWO (c) at different temperatures (indicated).

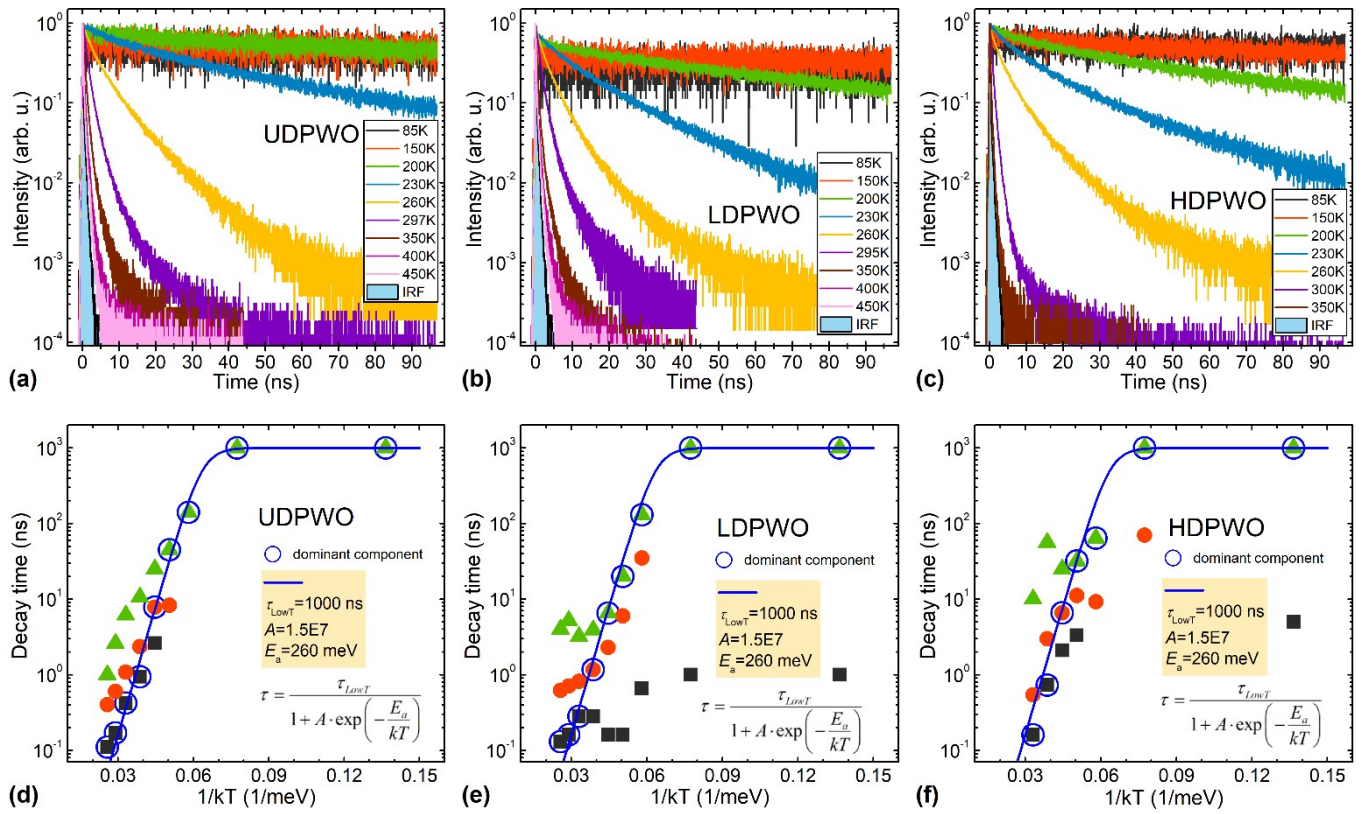

**Fig. S3** Normalized photoluminescence kinetics of samples UDPWO (a), LDPWO (b), and HDPWO (c) at different temperatures (indicated) and photoluminescence decay time constants (fast, medium, and slow) obtained from the multi-exponential fit of photoluminescence kinetics for the same samples UDPWO (d), LDPWO (e), and HDPWO (f). The decay time of the highest-intensity component at each temperature is indicated by a blue circle. The blue line represents a fit by Arrhenius equation using the parameters indicated in the plot legend.
